# Supplementary material
Source: publisher site journal article supplement (https://www.dovepress.com/article/544296)

Supplemental InformationFigure 1. Acknowledgement of ISPOR Guidelines for Budget Impact Analysis


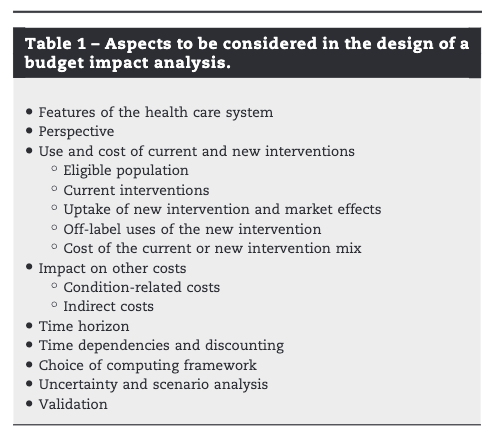

Supplement: Supplementary file 1 [file 544296-Supplementary%20Figure%201%20PR_1.docx]
